# Supplementary material for: Oxidative Damage and Antioxidant Defense in Sesamum indicum after Different Waterlogging Durations
Source: PubMed Central journal article supplement (PMC6681296; doi:10.3390/plants8070196), 2019-06-29
Supplement: plants-08-00196-s001.pdf [file plants-08-00196-s001.pdf]

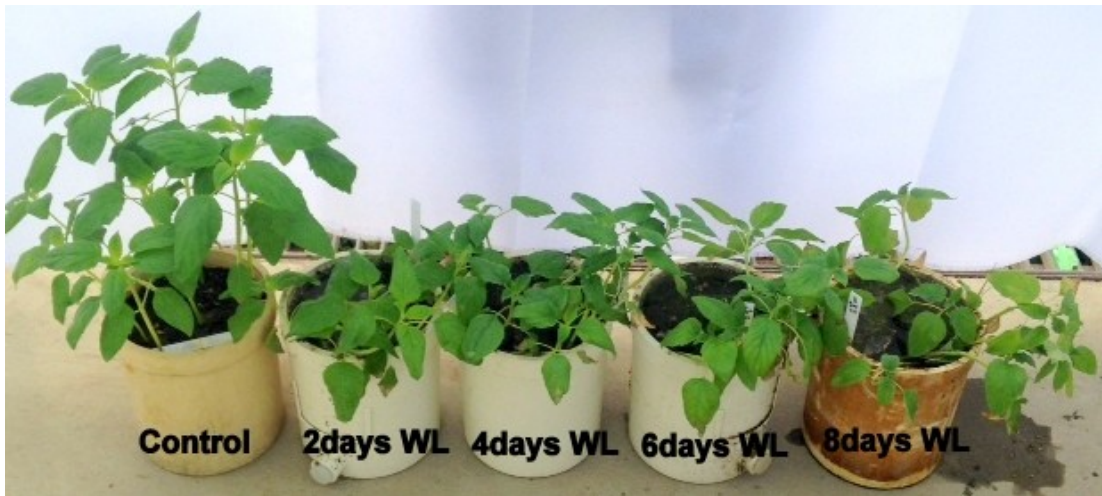

**Supplementary Figure S1.** Phenotypic appearance of sesame plants under different levels of waterlogging.

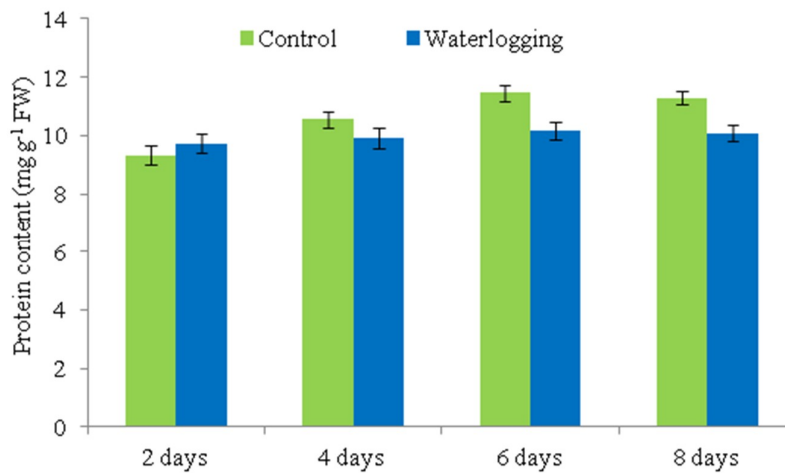

**Supplementary Figure S2.** Protein content in sesame leaves from plants at vegetative stage under different waterlogging durations. Mean ( $\pm$ SD) was calculated from three replicates for each treatment.
